# Supplementary material for: Sp110 enhances macrophage resistance to Mycobacterium tuberculosis via inducing endoplasmic reticulum stress and inhibiting anti-apoptotic factors
Source: PubMed Central journal article supplement (PMC5609983; doi:10.18632/oncotarget.19300), 2017-07-17
Supplement: oncotarget-08-64050-s001.pdf [file oncotarget-08-64050-s001.pdf]

## Sp110 enhances macrophage resistance to *Mycobacterium tuberculosis* via inducing endoplasmic reticulum stress and inhibiting anti-apoptotic factors

### SUPPLEMENTARY MATERIALS

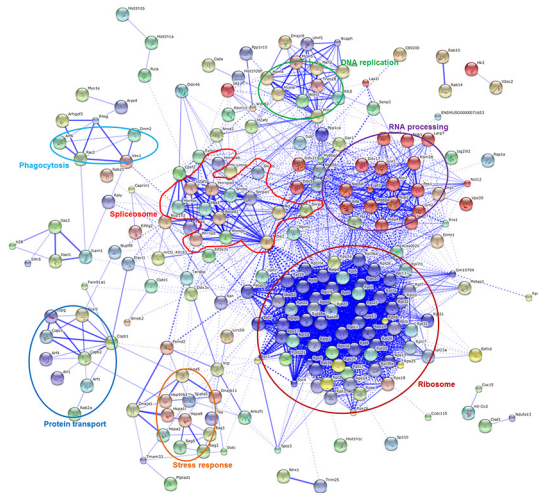

**Supplementary Figure 1. Network map of the known interactions among Sp110-interacting proteins.** The protein-protein interaction network was generated by STRING 10 software package. The known protein complexes are depicted as colored circles.

**Supplementary Table 1: Ipr1 interactome identified by mass spectrometry.**

See Supplementary File 1

**Supplementary Table 2: KEGG pathway analysis of Ipr1 interacting proteins.**

See Supplementary File 2

**Supplementary Table 3: Mass spectrometry identified Ipr1-interacting partners which involved in ribosome biogenesis.**

See Supplementary File 3

Supplementary Table 4: Primers used for qPCR analysis of mRNA

| Primer name  | Sequence (5'-3')         |
|--------------|--------------------------|
| qBcl2-F (m)  | GGAGGCTGGGATGCCTTTGT     |
| qBcl2-R (m)  | TGCACCCAGAGTGATGCAG      |
| qNcl-F(m)    | CGCCTTTCCAGAGGCGATTA     |
| qNcl-R(m)    | GTGGGTTTTGCCAGCCTTTG     |
| qRps3a-F(m)  | GGTCAAGAAGTGGCAGACCA     |
| qRps3a-R(m)  | TGCTGCGCATAGGATGTCTT     |
| qGapdh-F (m) | GTGTTCTACCCCCAATGTGT     |
| qGapdh-R (m) | ATTGTCATACCAGGAAATGAGCTT |
| qHSPA5-F (B) | CCTGTTCCGTTCCACCATGA     |
| qHSPA5-R (B) | CCACAGCCTCATCTGGGTTT     |
| qDDIT3-F (B) | CACCTGAAAGCAGAGCCTGA     |
| qDDIT3-R (B) | ACAGGTGCCCCGATTTTCAT     |
| qHSPA8-F (B) | TGGCAGGCCTAAGGTTCAAG     |
| qHSPA8-R (B) | AGCGTTGGTAACCGTCTTCC     |
| qBCL2-F (B)  | TCATGTGTGTGGAGAGCGTC     |
| qBCL2-R (B)  | CTCCACAAAGGCGTCCCAG      |
| qGAPDH-F (B) | GGCGTGAACCACGAGAAGTA     |
| qGAPDH-R (B) | GGCGTGGACAGTGGTCATAA     |

**m: mouse; B: Bovine**
